# Supplementary material for: Cestode larvae excite host neuronal circuits via glutamatergic signalling
Source: eLife. 2025 Jul 4;12:RP88174. doi: 10.7554/eLife.88174 (PMC12227199; doi:10.7554/eLife.88174)
Supplement: Figure 1—source data 1. [file elife-88174-fig1-data1.xlsx]

## Sheet: Figure 1
Figure no	Date	Recording Name	Slice number	Cell number	Resting Vm	Rt	Ra	Rm	Cm
1B	2016-05-26	16052601	1	1	-60	Not recorded	23	Not recorded	Not recorded
1C	2018-12-11	181211_001	1	1	-63	Not recorded	Not recorded	Not recorded	Not recorded
1D	1812181211	210625_003 .Puff T.crass.6	1	1	close to -60 mV		< 50
1D	2018-10-02	run11_Mmstack_Pos0	1	NA
