# Supplementary material for: Cestode larvae excite host neuronal circuits via glutamatergic signalling
Source: eLife. 2025 Jul 4;12:RP88174. doi: 10.7554/eLife.88174 (PMC12227199; doi:10.7554/eLife.88174)
Supplement: Figure 2—source data 1. [file elife-88174-fig2-data1.xlsx]

## Sheet: Figure 2
Figure no	Population	Date	Recording Name	Slice number	Cell number	Max Vm shift	Resting Vm	Rt	Ra	Rm	Cm	Comments
2C	K+ (11.39mM)	17070401	1059:1074, 1042:1057	1	1	0.67908	-63	Not recorded	20	Not recorded	Not recorded
		18062101	1020-1030	1	1	0.21	-55	Not recorded	15	Not recorded	Not recorded
		18062101	1055-1065	2	1	1.13	-67	Not recorded	13.5	Not recorded	Not recorded
		18062101	1184-1194, 1195-1212	2	2	0.46449	Not recorded	Not recorded	Not recorded	Not recorded	Not recorded
		18062101	1256-1266, 1245-1255	2	3	2.23335	-55	Not recorded	10	Not recorded	Not recorded
		18062102	1010-1021	1	1	0.77	-56	Not recorded	15	Not recorded	Not recorded
		18062102	1063-1075	1	2	0.65	-48	Not recorded	28	Not recorded	Not recorded
		18062102	1098-1114	1	3	0.77	-40	Not recorded	12	Not recorded	Not recorded
2C	T crass	15091601	1083,4,7	1	1	10,12	Not recorded	Not recorded	< 50	Not recorded	Not recorded
		15091602	1030-33,1083,84,87,1045	1	1	10,54	Not recorded	Not recorded	< 50	Not recorded	Not recorded
		16030401	1005,1047	1	1	14,44	Not recorded	Not recorded	17.5	Not recorded	Not recorded
		16032301	1010	1	1	10,05	-61	Not recorded	21	Not recorded	Not recorded
		16032301	1085	1	2	9,81	-62	Not recorded	21.5	Not recorded	Not recorded
2C	T crass + cesium	16092001	1043 1047:1050	1	1	11.8771	-60	Not recorded	49	Not recorded	Not recorded
		16092002	1019 only	1	1	10.77	-44	Not recorded	11.5	Not recorded	Not recorded
		16092003	1009-1010	1	1	21.0922	-56	Not recorded	12	Not recorded	Not recorded
		16092101	1009:1013	1	1	20.4231	-60	Not recorded	12	Not recorded	Not recorded
		16092102	1140:1143	1	2	10.1996	-60	Not recorded	11	Not recorded	Not recorded
		16092102	1010:1012 1014:1018	1	1	8.323	-40	Not recorded	16	Not recorded	Not recorded
		16110701	1019	1	1	20.999	-70	Not recorded	15.5	Not recorded	Not recorded
		16111602	1010:1011 1017:1020	1	1	6.9077	-63	Not recorded	34	Not recorded	Not recorded
		17020601	1015-1020	1	1	8.0679	-50	Not recorded	17	Not recorded	Not recorded
		17020901	998-1006	1	1	11.8174	-70	Not recorded	11	Not recorded	Not recorded
		17020902	1003 1005 1006 1008:1010	1	1	10.8259	-63	Not recorded	18	Not recorded	Not recorded
		17020903	1010:1014,	1	1	2.207	-61	Not recorded	21	Not recorded	Not recorded
		17102501	1005-1013	1	1	17.092	-60	Not recorded	16	Not recorded	Not recorded
		17102502	1030,31,34,36,37-1040,42-44	1	1	9.9765	Not recorded	Not recorded	< 50	Not recorded	Not recorded
		17102503	1012,1014-20	1	1	10.2445	Not recorded	Not recorded	9	Not recorded	Not recorded
		17102601	999-1005, 1009-1012	1	1	17.4472	-63	Not recorded	15	Not recorded	Not recorded
		17102701	1067-70,72-78	1	1	13.1218	Not recorded	Not recorded	36	Not recorded	Not recorded
		17103001	1053-62	1	1	9.1477	-66	Not recorded	27	Not recorded	Not recorded
		17103002	996-1006	1	1	15.4412	-63	Not recorded	28	Not recorded	Not recorded
		17103003	1009-1014,1016-19,21-24	1	1	21.4449	-63	Not recorded	67	Not recorded	Not recorded
		17103101	999-1004, 06,07,09,11	1	1	22.5472	-60	Not recorded	22	Not recorded	Not recorded
		17103102	1000-1009	1	1	12.3397	-55	Not recorded	66	Not recorded	Not recorded
		17103103	1014-1024	1	1	19.5024	-58	Not recorded	28	Not recorded	Not recorded
		17102504	1001,02,04-06,08	1	1	10.9057	Not recorded	Not recorded	34	Not recorded	Not recorded
		17112801	1029-1041	1	1	14.3769	-55	Not recorded	24	Not recorded	Not recorded
		17112901	1020,1026-1030,1035-37,104042, 44,45	1	1	11.1382	-65	Not recorded	51	Not recorded	Not recorded
		17112902	1069,1070,1084,1085,1087,1089, 1094-1096	1	1	23.38	-60	Not recorded	18	Not recorded	Not recorded
		17120401	1004,1005,1012,1014,1015	1	1	13.0029	-65	Not recorded	16.5	Not recorded	Not recorded
		18012402	1025-28, 1033-35, 1042-1044	1	1	14.6907	Not recorded	Not recorded	8	Not recorded	Not recorded
		18012501	1027-1037	1	1	9.1026	Not recorded	Not recorded	23	Not recorded	Not recorded
		18012502	1021-1027	1	1	10.5704	Not recorded	Not recorded	23.5	Not recorded	Not recorded
		18012503	1035-1046	1	1	15.0011	Not recorded	Not recorded	42	Not recorded	Not recorded
		18012901	1006-1015	1	1	13.3387	Not recorded	Not recorded	55	Not recorded	Not recorded
		18012902	997-1003	1	1	20.9088	Not recorded	Not recorded	11	Not recorded	Not recorded
		17120601	999,1000,1002-1005,1007,1008,1011-14	1	1	13.755	-65	Not recorded	29	Not recorded	Not recorded
		17120602	1025,1027-1035	1	1	13.5643	-65	Not recorded	34	Not recorded	Not recorded
		17120701	1022-25,1027-28,1034,36,37	1	1	23.6002	-68	Not recorded	33	Not recorded	Not recorded
		17120702	1002-1006,1008-1012	1	1	14.7189	-65	Not recorded	25.5	Not recorded	Not recorded
		17120703	995-1007	1	1	15.693	-54	Not recorded	51	Not recorded	Not recorded
		18012601	1012-15, 1017-1021	1	1	12.011	Not recorded	Not recorded	17	Not recorded	Not recorded
		18012602	997-1007	1	1	13.2245	Not recorded	Not recorded	55	Not recorded	Not recorded
		18012603	995-1000, 1002-1007	1	1	15.3904	Not recorded	Not recorded	16	Not recorded	Not recorded
		18013001	1019-1029	1	1	17.1946	Not recorded	Not recorded	25	Not recorded	Not recorded
		18013002	1015-1027	1	1	15.6611	Not recorded	Not recorded	48	Not recorded	Not recorded
		18011901	1093-98, 1100, 1102-03, 1110-1120	1	1	12.9905	Not recorded	Not recorded	21	Not recorded	Not recorded
		18012301	1026-27, 1030, 1033-1040	1	1	29.9766	Not recorded	Not recorded	42	Not recorded	Not recorded
		18012302	1048-1058	1	1	17.2762	Not recorded	Not recorded	14	Not recorded	Not recorded
		18012303	1026-28,1035-36,1040, 1044-48	1	1	16.2792	Not recorded	Not recorded	16	Not recorded	Not recorded
		18012401	1013,1015,1019-1028	1	1	14.0887	Not recorded	Not recorded	27.5	Not recorded	Not recorded
2E	T crass hom	16092001	1043 1047:1050	1	1	11.8771	-60	Not recorded	49	Not recorded	Not recorded
		16092002	1019 only	1	1	10.77	-44	Not recorded	11.5	Not recorded	Not recorded
		16092003	1009-1010	1	1	21.0922	-56	Not recorded	12	Not recorded	Not recorded
		16092101	1009:1013	1	1	20.4231	-60	Not recorded	12	Not recorded	Not recorded
		16092102	1140:1143	1	2	10.1996	-60	Not recorded	11	Not recorded	Not recorded
		16092102	1010:1012 1014:1018	1	1	8.323	-40	Not recorded	16	Not recorded	Not recorded
		16110701	1019	1	1	20.999	-70	Not recorded	15.5	Not recorded	Not recorded
		16111602	1010:1011 1017:1020	1	1	6.9077	-63	Not recorded	34	Not recorded	Not recorded
		17020601	1015-1020	1	1	8.0679	-50	Not recorded	17	Not recorded	Not recorded
		17020901	998-1006	1	1	11.8174	-70	Not recorded	11	Not recorded	Not recorded
		17020902	1003 1005 1006 1008:1010	1	1	10.8259	-63	Not recorded	18	Not recorded	Not recorded
		17020903	1010:1014,	1	1	2.207	-61	Not recorded	21	Not recorded	Not recorded
		17102501	1005-1013	1	1	17.092	-60	Not recorded	16	Not recorded	Not recorded
		17102502	1030,31,34,36,37-1040,42-44	1	1	9.9765	Not recorded	Not recorded	< 50	Not recorded	Not recorded
		17102503	1012,1014-20	1	1	10.2445	Not recorded	Not recorded	9	Not recorded	Not recorded
		17102601	999-1005, 1009-1012	1	1	17.4472	-63	Not recorded	15	Not recorded	Not recorded
		17102701	1067-70,72-78	1	1	13.1218	Not recorded	Not recorded	36	Not recorded	Not recorded
		17103001	1053-62	1	1	9.1477	-66	Not recorded	27	Not recorded	Not recorded
		17103002	996-1006	1	1	15.4412	-63	Not recorded	28	Not recorded	Not recorded
		17103003	1009-1014,1016-19,21-24	1	1	21.4449	-63	Not recorded	67	Not recorded	Not recorded
		17103101	999-1004, 06,07,09,11	1	1	22.5472	-60	Not recorded	22	Not recorded	Not recorded
		17103102	1000-1009	1	1	12.3397	-55	Not recorded	66	Not recorded	Not recorded
		17103103	1014-1024	1	1	19.5024	-58	Not recorded	28	Not recorded	Not recorded
		17102504	1001,02,04-06,08	1	1	10.9057	Not recorded	Not recorded	34	Not recorded	Not recorded
		17112801	1029-1041	1	1	14.3769	-55	Not recorded	24	Not recorded	Not recorded
		17112901	1020,1026-1030,1035-37,104042, 44,45	1	1	11.1382	-65	Not recorded	51	Not recorded	Not recorded
		17112902	1069,1070,1084,1085,1087,1089, 1094-1096	1	1	23.38	-60	Not recorded	18	Not recorded	Not recorded
		17120401	1004,1005,1012,1014,1015	1	1	13.0029	-65	Not recorded	16.5	Not recorded	Not recorded
		18012402	1025-28, 1033-35, 1042-1044	1	1	14.6907	Not recorded	Not recorded	8	Not recorded	Not recorded
		18012501	1027-1037	1	1	9.1026	Not recorded	Not recorded	23	Not recorded	Not recorded
		18012502	1021-1027	1	1	10.5704	Not recorded	Not recorded	23.5	Not recorded	Not recorded
		18012503	1035-1046	1	1	15.0011	Not recorded	Not recorded	42	Not recorded	Not recorded
		18012901	1006-1015	1	1	13.3387	Not recorded	Not recorded	55	Not recorded	Not recorded
		18012902	997-1003	1	1	20.9088	Not recorded	Not recorded	11	Not recorded	Not recorded
		17120601	999,1000,1002-1005,1007,1008,1011-14	1	1	13.755	-65	Not recorded	29	Not recorded	Not recorded
		17120602	1025,1027-1035	1	1	13.5643	-65	Not recorded	34	Not recorded	Not recorded
		17120701	1022-25,1027-28,1034,36,37	1	1	23.6002	-68	Not recorded	33	Not recorded	Not recorded
		17120702	1002-1006,1008-1012	1	1	14.7189	-65	Not recorded	25.5	Not recorded	Not recorded
		17120703	995-1007	1	1	15.693	-54	Not recorded	51	Not recorded	Not recorded
		18012601	1012-15, 1017-1021	1	1	12.011	Not recorded	Not recorded	17	Not recorded	Not recorded
		18012602	997-1007	1	1	13.2245	Not recorded	Not recorded	55	Not recorded	Not recorded
		18012603	995-1000, 1002-1007	1	1	15.3904	Not recorded	Not recorded	16	Not recorded	Not recorded
		18013001	1019-1029	1	1	17.1946	Not recorded	Not recorded	25	Not recorded	Not recorded
		18013002	1015-1027	1	1	15.6611	Not recorded	Not recorded	48	Not recorded	Not recorded
		18011901	1093-98, 1100, 1102-03, 1110-1120	1	1	12.9905	Not recorded	Not recorded	21	Not recorded	Not recorded
		18012301	1026-27, 1030, 1033-1040	1	1	29.9766	Not recorded	Not recorded	42	Not recorded	Not recorded
		18012302	1048-1058	1	1	17.2762	Not recorded	Not recorded	14	Not recorded	Not recorded
		18012303	1026-28,1035-36,1040, 1044-48	1	1	16.2792	Not recorded	Not recorded	16	Not recorded	Not recorded
		18012401	1013,1015,1019-1028	1	1	14.0887	Not recorded	Not recorded	27.5	Not recorded	Not recorded
2E	T crass hom (>3kDa)	16111601	1060-1069	1	1	0,16	-63		34
		16111702	1006-1018	1	1	1,21	-40		18
		16111801	1018:1025	1	1	0,24	-60		27
		16111801	1056:1060	1	2	0,27	-69		13
		16111802	985-995	1	1	0,49	-60		15
2F	T. crass E/S	180706	180706_001	1	1	19.8393	-50	89	50	15	230	2mM Ca, 2mM Mg, TTX, Caesium internal
		180706	180706_003	1	2	4.5741	Not recorded	Not recorded	Not recorded	Not recorded	2500	2mM Ca, 2mM Mg, TTX, Caesium internal
		180711	180711_002	1	1	14.0741	-64	110	44	12	290	2mM Ca, 2mM Mg, TTX, Caesium internal
		180713	180713_001	1	1	13.5747	-40	73	79	17	470	2mM Ca, 2mM Mg, TTX, Caesium internal
		180713	180713_002	1	2	12.4039	-64	110	44	12	290	2mM Ca, 2mM Mg, TTX, Caesium internal
		180713	180713_004	1	4	9.9409	-56	120	34	12	330	2mM Ca, 2mM Mg, TTX, Caesium internal
2F	T. crass E/S > 3 kDa	180731	180731_001	1	1	-0.62453	-64	106	50	58	115	2mM Ca, 2mM Mg, TTX, Caesium internal
		180731	180731_002	1	2	1.0171	-65	125	33	92	277	2mM Ca, 2mM Mg, TTX, Caesium internal
		180731	180731_003	1	3	1.3698	-60	155	12	145	360	2mM Ca, 2mM Mg, TTX, Caesium internal
		180731	180731_004	1	4	2.4951	-64	120	22	100	295	2mM Ca, 2mM Mg, TTX, Caesium internal
		180731	180731_006	1	5	1.0463	-64	137	16	120	306	2mM Ca, 2mM Mg, TTX, Caesium internal
		180731	180731_007	1	6	3.5992	-46	110	11	100	380	2mM Ca, 2mM Mg, TTX, Caesium internal
		180731	180731_008	1	7	1.2189	-50	119	31	87	275	2mM Ca, 2mM Mg, TTX, Caesium internal
		180731	180731_009	1	8	1.2897	-45	120	14	113	345	2mM Ca, 2mM Mg, TTX, Caesium internal
2F	Medium	180621	180621_001	1	1	0.35115	Not recorded	Not recorded	Not recorded	Not recorded	290	2mM Ca, 2mM Mg, TTX, Caesium internal
		180621	180621_002	1	2	0.14858	Not recorded	190	48	6	228	2mM Ca, 2mM Mg, TTX, Caesium internal
		180628	180628_001	1	1	0.70199	-43	80	10	12	160	2mM Ca, 2mM Mg, TTX, Caesium internal
		180628	180628_002	1	2	-0.61089	-40	200	10	10	180	2mM Ca, 2mM Mg, TTX, Caesium internal
		180628	180628_003	1	3	-0.80118	Not recorded	Not recorded	Not recorded	Not recorded	400	2mM Ca, 2mM Mg, TTX, Caesium internal
		180628	180628_004	1	4	-0.67258	-53	135	30	10	218	2mM Ca, 2mM Mg, TTX, Caesium internal
2E	PBS	180725	180725_001	1	1	0.57693	-36	133	45	9	290	2mM Ca, 2mM Mg, TTX, Caesium internal
		180725	180725_003	1	2	0.86125	-45	130	76	6	520	2mM Ca, 2mM Mg, TTX, Caesium internal
		180725	180725_004	1	3	1.6451	-47	166	79	6.7	500	2mM Ca, 2mM Mg, TTX, Caesium internal
		180725	180725_005	1	4	2.2861	-48	101	77	11	470	2mM Ca, 2mM Mg, TTX, Caesium internal
		180726	180726_002	1	2	0.42598	-46	57	25	33	303	2mM Ca, 2mM Mg, TTX, Caesium internal
		180726	180726_003	1	3	0.60555	-59	160	27	137	257	2mM Ca, 2mM Mg, TTX, Caesium internal
		180726	180726_004	1	4	1.1429	-50	110	16	94	314	2mM Ca, 2mM Mg, TTX, Caesium internal
