# Supplementary material for: Cestode larvae excite host neuronal circuits via glutamatergic signalling
Source: eLife. 2025 Jul 4;12:RP88174. doi: 10.7554/eLife.88174 (PMC12227199; doi:10.7554/eLife.88174)
Supplement: Figure 3—source data 1. [file elife-88174-fig3-data1.xlsx]

## Sheet: Figure 3
Figure no	Population	Date	Recording Name	Slice number	Cell number	Max Vm shift Baseline	Max Vm shift blockers	Max Vm shift Wash out	Resting Vm	Rt	Ra	Rm	Cm
Fig 3B	Substance P	171023	1710230101	1	1	0.0075014	NA	NA	-66	Not recorded	23	Not recorded	Not recorded
		171023	1710230102	1	2	0.09	NA	NA	sitting near -60	Not recorded	42	Not recorded	Not recorded
		171023	1710230103	1	3	0.079778	NA	NA	-67	Not recorded	Not recorded	Not recorded	Not recorded
		171023	1710230104	1	4	0.02	NA	NA	-63	Not recorded	13	Not recorded	Not recorded
		171023	1710230105	1	5	0.14153	NA	NA	-64	Not recorded	16	Not recorded	Not recorded
Fig 3D	nAChR Blocker + T. crass hom	180119	18011901	1	1	12.99	12.16	25.64	sitting near -60	Not recorded	21	Not recorded	Not recorded
		180123	18012301	1	1	29.98	16.58	11.86	sitting near -60	Not recorded	42	Not recorded	Not recorded
		180123	18012302	1	1	17.28	21.68	21.32	sitting near -60	Not recorded	14	Not recorded	Not recorded
		180123	18012303	1	1	16.28	10.26	8.87	sitting near -60	Not recorded	16	Not recorded	Not recorded
		180124	18012401	1	1	14.09	27.31	13.2	sitting near -60	Not recorded	27.5	Not recorded	Not recorded
Fig 3F	ASICR Blocker	171025	17102504	1	1	10.91	9.31	Not recorded	sitting near -60	Not recorded	34	Not recorded	Not recorded
		171128	17112801	1	1	14.38	3.3	10.53	-55	Not recorded	24	Not recorded	Not recorded
		171129	17112901	1	1	11.14	21.94	16.51	-65	Not recorded	51	Not recorded	Not recorded
		171129	17112902	1	1	23.38	20.87	24.4	-60	Not recorded	18	Not recorded	Not recorded
		171204	17120401	1	1	13	5.53	3.99	-65	Not recorded	16.5	Not recorded	Not recorded
		180124	18012402	1	1	14.69	2.65	15.07	sitting near -60	Not recorded	8	Not recorded	Not recorded
		180125	18012501	1	1	9.1	10.85	14.81	sitting near -60	Not recorded	23	Not recorded	Not recorded
		180125	18012502	1	1	10.57	16	25.48	sitting near -60	Not recorded	23.5	Not recorded	Not recorded
		180125	18012503	1	1	15	8.5	20.19	sitting near -60	Not recorded	42	Not recorded	Not recorded
		180129	18012901	1	1	13.34	18.41	14.16	sitting near -60	Not recorded	55	Not recorded	Not recorded
		180129	18012902	1	1	20.91	13.13	25.47	sitting near -60	Not recorded	11	Not recorded	Not recorded
Fig 3H	GluR blockers + T. crass hom	171206	17120601	1	1	13.76	1.29	7.17	-65	Not recorded	29	Not recorded	Not recorded
		171206	17120602	1	1	13.56	1.9	12.73	-65	Not recorded	34	Not recorded	Not recorded
		171207	17120701	1	1	23.6	10.1	16.2	-68	Not recorded	33	Not recorded	Not recorded
		171207	17120702	1	1	14.72	2.4	16.56	-65	Not recorded	25.5	Not recorded	Not recorded
		171207	17120703	1	1	15.69	2.01	7.46	-54	Not recorded	51	Not recorded	Not recorded
		180126	18012601	1	1	12.01	0.71	14.37	sitting near -60	Not recorded	17	Not recorded	Not recorded
		180126	18012602	1	1	13.22	2.02	15.04	sitting near -60	Not recorded	55	Not recorded	Not recorded
		180126	18012603	1	1	15.39	0.88	17.28	sitting near -60	Not recorded	16	Not recorded	Not recorded
		180130	18013001	1	1	17.19	2.14	Not recorded	sitting near -60	Not recorded	25	Not recorded	Not recorded
		180130	18013002	1	1	15.66	1.61	6.23	sitting near -60	Not recorded	48	Not recorded	Not recorded
Fig 3J	GluR blockers + T. crass E/S	181120	18112002	1	1	14.8162	1.7524	15.0749	-62	114	21	93	330
		181120	18112001	2	1	12.8775	1.4084	11.604	-59	89	34	53	344
		181121	18112101	1	1	16.6347	1.8056	13.9735	-65	132	62	69	228
		181121	18112102	2	1	15.3129	1.0731	24.2086	-64	105	46	60	227
		181122	18112201	1	1	15.2837	4.2127	22.7821	-59	92	10	86	500
		181122	18112202	2	1	17.1257	2.3767	17.7122	-62	117	42	77	266
		181122	18112203	3	1	16.0618	2.711	14.55	-51	153	67	84	211
		181122	18112204	4	1	17.9124	2.0062	18.5523	-59	100	28	70	266
		181126	18112602	1	1	22.3845	4.1394	15.1405	-54	93	16	78	337
		181126	18112603	2	1	30.4691	12.5351	27.1231	-70	82	11	72	437
