# Supplementary material for: Cestode larvae excite host neuronal circuits via glutamatergic signalling
Source: eLife. 2025 Jul 4;12:RP88174. doi: 10.7554/eLife.88174 (PMC12227199; doi:10.7554/eLife.88174)
Supplement: Figure 4—source data 1. [file elife-88174-fig4-data1.xlsx]

## Sheet: Figure 4G Imaging data
Figure no	Population	Date	Recording Name	Slice number	Cell number	Baseline fluorescence	Peak fluorescence	ΔF/F	Peak ΔF/F shift (%)
Fig 4G	aCSF	210706	210706_001	1	1	239526	242396	0.011979	1.1979
		210706	210706_002	1	2	-376360	-372104	-0.0113087	-1.13087
		210706	210706_003	1	3	695840	680278	-0.0223651	-2.23651
		210706	210706_006	1	4	-710603	-723620	0.0183182	1.83182
		210706	210706_007	1	5	154589	156667	0.0134435	1.34435
		210706	210706_008	1	6	952382	953588	0.00126591	0.126591
		210706	210706_009	1	7	-389542	-387879	-0.0042688	-0.42688
		210706	210706_010	1	8	405661	405598	-0.000156347	-0.0156347
		210706	210706_011	1	9	389143	389213	0.000179603	0.0179603
		210706	210706_012	1	10	1.11741e+06	1.11425e+06	-0.0028281	-0.28281
		210706	210706_013	1	11	714946	712222	-0.00381028	-0.381028
		210706	210706_014	1	12	782257	785917	0.00467828	0.467828
Fig 4G	T. crass. Hom.	200908	20090801_003	1	1	1.30083e-05	1.73937e-05	0.337123	33.7123
		200908	20090801_004	1	2	1.61556e-05	2.64273e-05	0.635801	63.5801
		200908	20090801_007	1	3	4.60428e-06	7.54e-06	0.637608	63.7608
		200908	20090801_013	1	4	8.53121e-06	1.66984e-05	0.957333	95.7333
		200908	20090801_015	1	5	1.21318e-05	1.42723e-05	0.176435	17.6435
		200908	20090801_021	1	6	1.91663e-05	3.15488e-05	0.646057	64.6057
		200908	20090801_022	1	7	2.3017e-05	3.41155e-05	0.482191	48.2191
		200908	20090801_023	1	8	2.84529e-05	3.58667e-05	0.260565	26.0565
		200908	20090801_027	1	9	1.4342e-05	1.96988e-05	0.37351	37.351
		200908	20090801_030	1	10	5.23212e-06	5.47853e-06	0.0470949	4.70949
		200908	20090801_034	1	11	4.02234e-05	5.09376e-05	0.266366	26.6366
		200908	20090802_007	2	1	4.14204e-06	5.31771e-06	0.283839	28.3839
		200908	20090802_013	2	2	3.92319e-05	5.40047e-05	0.37655	37.655
		200908	20090802_015	2	3	6.65363e-06	8.74075e-06	0.313682	31.3682
		210202	21020201_001	1	1	7.05989e+06	8.00909e+06	0.13445	13.445
		210202	21020201_004	1	2	2.16887e+07	2.26121e+07	0.0425758	4.25758
		210202	21020201_007	1	3	2.28486e+07	2.34392e+07	0.0258489	2.58489
		210202	21020201_010	1	4	4.17275e+07	4.43049e+07	0.061767	6.1767
		210202	21020201_034	1	5	3.46546e+06	3.636e+06	0.0492105	4.92105
		210202	21020201_038	1	6	1.61145e+06	1.67295e+06	0.0381612	3.81612
		210202	21020202_001	2	1	3.91671e+06	4.13111e+06	0.0547392	5.47392
		210202	21020202_010	2	2	4.12697e+06	4.28592e+06	0.0385156	3.85156
		210202	21020202_013	2	3	847207	896269	0.0579101	5.79101
		210202	21020202_015	2	4	2.4255e+06	2.56162e+06	0.0561202	5.61202
		210208	21020801_005	1	1	587222	724143	0.233166	23.3166
		210208	21020801_007	1	2	156276	256443	0.640959	64.0959
		210208	21020801_012	1	3	832044	990555	0.190508	19.0508
		210208	21020801_015	1	4	1.54446e+06	1.6833e+06	0.0898961	8.98961
		210208	21020801_019	1	5	196417	354020	0.802388	80.2388
		210208	21020801_022	1	6	752681	871901	0.158395	15.8395
		210208	21020801_026	1	7	894780	1.20899e+06	0.351159	35.1159
		210208	21020801_028	1	8	616339	698718	0.133659	13.3659
		210208	21020801_032	1	9	564154	667354	0.182928	18.2928
		210208	21020802_003	2	1	2.38996e+06	3.25918e+06	0.363693	36.3693
		210208	21020802_006	2	2	2.24309e+06	3.43009e+06	0.529178	52.9178
Fig 4G	T. crass. E/S	210706	21070601_004	1	1	9.39658e+07	1.05221e+08	0.119784	11.9784
		210706	21070601_007	1	2	3.735e+07	4.29492e+07	0.149911	14.9911
		210706	21070601_010	1	3	9.68535e+07	9.87394e+07	0.0194712	1.94712
		210706	21070601_012	1	4	1.46023e+07	1.72903e+07	0.184076	18.4076
		210706	21070602_003	2	1	3.76735e+07	3.8579e+07	0.0240355	2.40355
		210706	21070602_008	2	2	8.72914e+06	9.00094e+06	0.0311371	3.11371
		210706	21070602_009	2	3	3.62528e+06	4.03891e+06	0.114098	11.4098
		210706	21070602_006	2	4	3.04997e+06	3.87776e+06	0.271407	27.1407
		210706	21070602_012	2	5	1.18111e+06	1.33154e+06	0.127366	12.7366
		210706	21070602_013	2	6	2.29931e+06	2.37613e+06	0.0334076	3.34076
Fig 4G	Glut.	200906	20090601_002	1	1	2.9451e-05	4.55511e-05	0.546676	54.6676
		200906	20090601_007	1	2	6.68027e-06	8.78073e-06	0.314428	31.4428
		200906	20090601_009	1	3	6.70863e-06	8.8058e-06	0.312607	31.2607
		200906	20090601_014	1	4	1.60732e-05	1.69912e-05	0.0571146	5.71146
		200906	20090601_015	1	5	1.78053e-05	2.09221e-05	0.175048	17.5048
		200906	20090601_020	1	6	1.18055e-05	2.23107e-05	0.889857	88.9857
		200906	20090601_024	1	7	6.18146e-06	8.23561e-06	0.332309	33.2309
		200906	20090601_028	1	8	2.02606e-05	2.31059e-05	0.140432	14.0432
		200906	20090602_002	2	1	5.18933e-05	6.00868e-05	0.157893	15.7893
		200906	20090602_005	2	2	6.35551e-05	9.89409e-05	0.556773	55.6773
		200906	20090602_007	2	3	5.43754e-05	7.75035e-05	0.42534	42.534
		200906	20090602_010	2	4	5.28185e-05	8.27846e-05	0.567341	56.7341
		200906	20090602_013	2	5	3.14855e-06	3.8395e-06	0.219448	21.9448
		200906	20090602_016	2	6	2.04058e-06	2.20167e-06	0.0789416	7.89416
Fig 4G	Asp.	210706	210706_001	1	1	1.293e+06	1.52133e+06	0.176587	17.6587
		210706	210706_004	1	2	1.8431e+06	2.12126e+06	0.150921	15.0921
		210706	210706_005	1	3	1.80112e+06	1.94987e+06	0.0825886	8.25886
		210706	210706_008	1	4	315931	469388	0.485729	48.5729
		210706	210706_010	1	5	944682	1.07684e+06	0.1399	13.99
