# Supplementary material for: Cestode larvae excite host neuronal circuits via glutamatergic signalling
Source: eLife. 2025 Jul 4;12:RP88174. doi: 10.7554/eLife.88174 (PMC12227199; doi:10.7554/eLife.88174)
Supplement: Figure 5—source data 1. [file elife-88174-fig5-data1.xlsx]

## Sheet: Figure 5 D-F
	T.crass hom glut					T.crass hom asp
Date of glut assay	Batch	Glut conc			Date of asp assay	Batch	Asp conc
181017 & 190320	B2	151.07			210513	10	25.8
181017 & 190320	B3	155.332			210513	11	16.5
181017 & 190320	B5	119.906			210617	5	35.1
181017 & 190320	B6	65.1067
181017 & 190320	B7	81.7046
	T. crass raw ES glut					T. crass raw ES asp
Date of glut assay	Batch	Glut conc			Date of asp assay	Batch	Asp conc
181017 & 190320	Oct 18 all	105.948			210617	Filt ES 30/5/18	44.0318
181017 & 190320	2019-05-18	32.9503			210617	E/S 3 raw 26/10	84.7426
181017 & 190320	2017 1	33.1161			210617	ES 1/11/19	17.558
181017 & 190320	2017 2	32.0873
181017 & 190320	Oct 18 1	72.3165
181017 & 190320	Oct 18 2	118.757
181017 & 190320	Oct 18 3	116.043
	T. crass daily glut production (ug/20 larvae/day)					T. crass daily asp production (ug/20 larvae/day)
Date of glut assay	Batch	Glut conc			Date of asp assay	Sample name	Asp conc
190715	D1W4	62.3616			210814	TC D1W4	0
190715	D1W5	50.3623			210814	TC D2W4	0
190715	D1W6	55.1861			210814	TC D3W4	0
190715	D2W4	41.4834			210814	TC D4W4	19.1469
190715	D2W5	60.3727			210814	TC D5W4	2.31226
190715	D2W6	54.5487			210814	TC D6W4	13.2665
190715	D3W4	41.59
190715	D3W5	50.5676			211126	TC D1W5	14.182
190715	D3W6	37.5347			211126	TC D2W5	9.43076
190715	D4W4	52.6654			211126	TC D3W5	11.9284
190715	D4W5	58.1881			211126	TC D4W5	12.1478
190715	D4W6	67.5349			211126	TC D5W5	14.3904
190715	D5W4	51.5625			211126	TC D6W5	16.0024
190715	D5W5	53.1822
190715	D5W6	55.4752			211126	TC D1W6	16.0662
190715	D6W4	67.1959			211126	TC D2W6	12.6231
190715	D6W5	60.152			211126	TC D3W6	12.5336
190715	D6W6	54.8691			211126	TCD4W6	13.3097
					211126	TC D5W6	12.9619
					211126	TC D6W6	13.3787
