# Supplementary material for: Cestode larvae excite host neuronal circuits via glutamatergic signalling
Source: eLife. 2025 Jul 4;12:RP88174. doi: 10.7554/eLife.88174 (PMC12227199; doi:10.7554/eLife.88174)
Supplement: Figure 6—source data 1. [file elife-88174-fig6-data1.xlsx]

## Sheet: Figure 6 A
Figure no	Date	Recording Name	Slice number	Cell number	Resting Vm	Rt	Ra	Rm	Cm	Comments
6A	200629	Human T.Puff T.solium6	1	1	-72	Not recorded	Not recorded	Not recorded	Not recorded

## Sheet: Figure 6 B
Figure no	Date	Recording Name	Slice number	Cell number	Resting Vm	Ra	Rm	Cm	Comments
6B	200629	Human T.Puff T.solium8	1	1	-80	14	66	319

## Sheet: Figure 6 C-D
	T. solium hom glut						T. solium hom asp
Date of glut assay	Batch	Glut conc				Date of asp assay	Batch	Asp conc
190508 Plate 1	Clys (German)	46.425				210814	TS hom SA	ND
	T. solium comb ES glut						T. solium comb ES asp
Date of glut assay	Batch	Glut conc				Date of asp assay	Batch	Asp conc
190508 Plate 2	CSN 1-3	722.553	This is the average of measurements for CSN1, CSN2 & CSN3			211126	TS D1-3	15.3	This is the average of measurements for D1, D2 & D3
	T. solium daily glut production (ug/20 larvae/day)						T. solium daily asp production (ug/20 larvae/day)
Date of glut assay	Batch	Glut conc				Date of asp assay	Sample name	Asp conc
190508 Plate 2	CSN1	391.107				211126	TS D1	0
190508 Plate 2	CSN2	0				211126	TS D2	8.41526
190508 Plate 2	CSN2	0				211126	TS D3	0
190508 Plate 2	CSN4	131.865				211126	TS D4	16.8171
190508 Plate 2	CSN5	140.568				211126	TS D5	28.0559
190508 Plate 2	CSN6	158.81				211126	TS D6	31.8568
